# Supplementary material
Source: PubMed Central journal article supplement (PMC4058299)
Supplement: NIHMS590863-supplement-01.pdf [file NIHMS590863-supplement-01.pdf]

1  
2  
3  
4  
5  
6  
7  
8  
9  
10  
11  
12  
13  
14  
15  
16  
17  
18  
19  
20  
21  
22  
23  
24  
25  
26  
27  
28  
29  
30  
31  
32  
33  
34  
35  
36  
37  
38  
39  
40  
41  
42  
43  
44  
45  
46  
47  
48  
49  
50  
51  
52  
53  
54  
55  
56  
57  
58  
59  
60

Supplementary Online Material for

**Neural Effects of Short-Term Training on Working Memory**

Martin Buschkuhl\*, Luis Hernandez-Garcia, Susanne M. Jaeggi,  
Jessica A. Bernard, and John Jonides

\*Author for correspondence. E-mail: mbuschkuehl@mindresearch.net

For Review Only

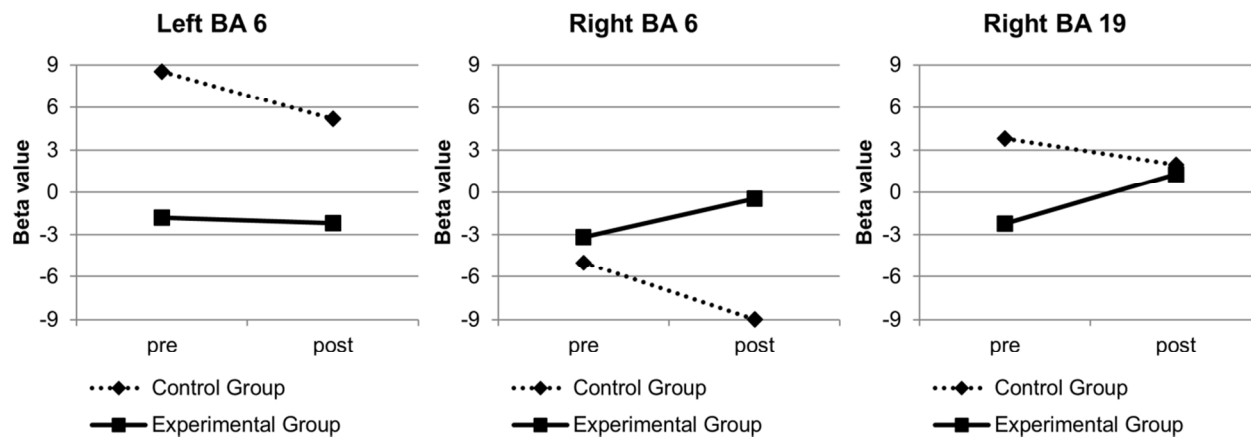

Figure S1. Beta values of the 4-back minus 1-back contrast as a function of group (Experimental vs Control) and test time (pre-test vs post-test).

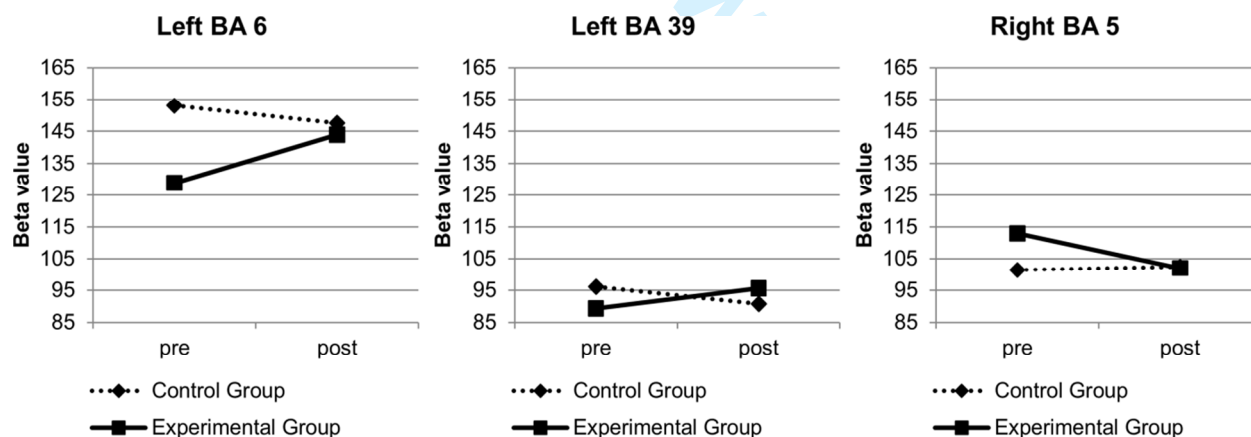

Figure S2. Beta values of the perfusion at rest condition as a function of group (Experimental vs Control) and test time (pre-test vs post-test).

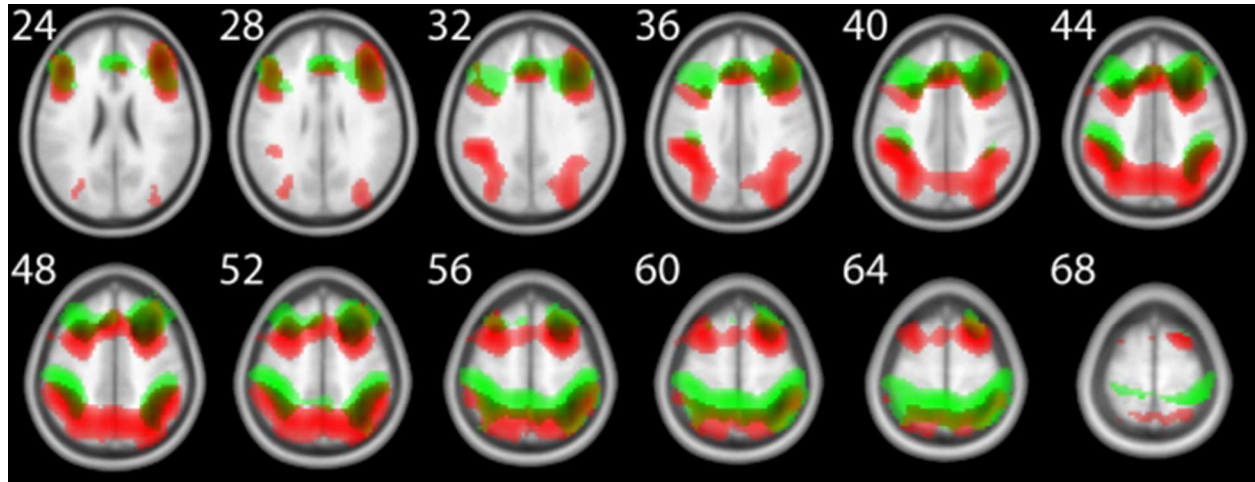

Figure S3. Activated brain regions *before* training. The map shows all voxels that are significantly different from zero in a *positive* direction. Red colors represent the control group, green colors represent the experimental group. The numbers next to each slice represent the z-coordinates in MNI space.

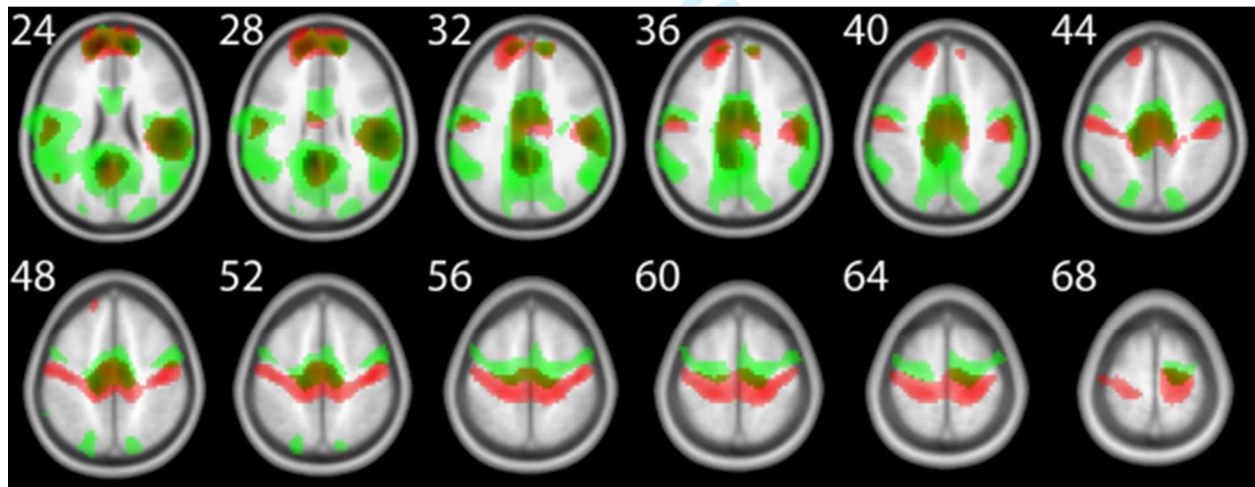

Figure S4. Activated brain regions *before* training. The map shows all voxels that are significantly different from zero in a *negative* direction. Red colors represent the control group, green colors represent the experimental group. The numbers next to each slice represent the z-coordinates in MNI space.

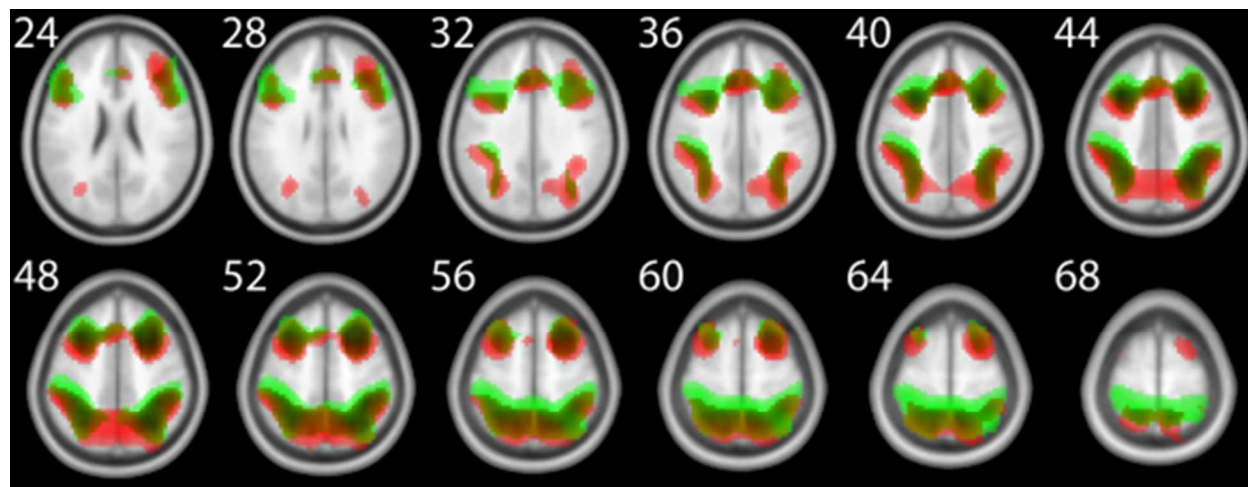

Figure S5. Activated brain regions *after* training. The map shows all voxels that are significantly different from zero in a *positive* direction. Red colors represent the control group, green colors represent the experimental group. The numbers next to each slice represent the z-coordinates in MNI space.

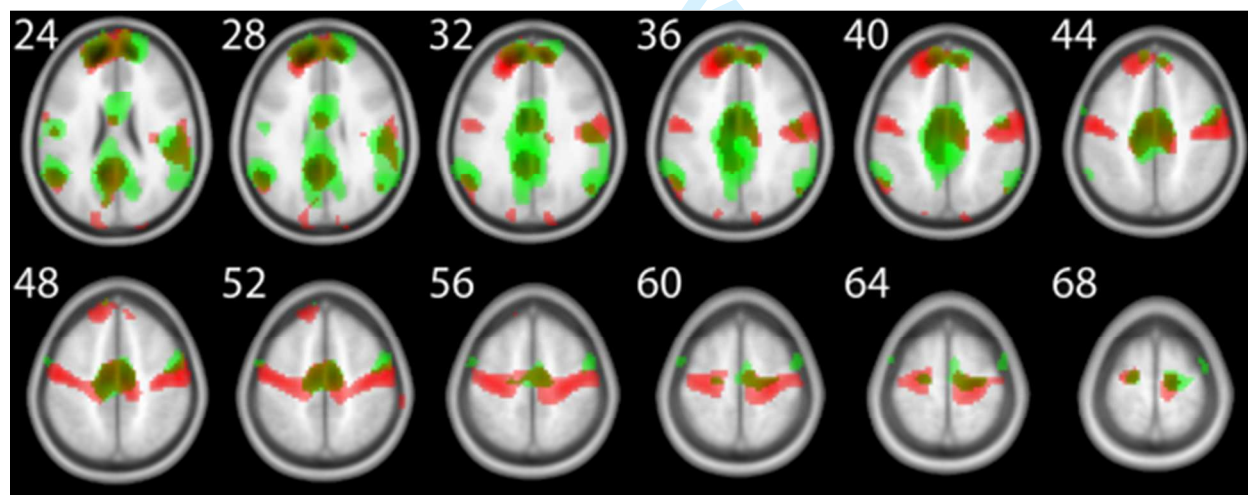

Figure S6. Activated brain regions *after* training. The map shows all voxels that are significantly different from zero in a *negative* direction. Red colors represent the control group, green colors represent the experimental group. The numbers next to each slice represent the z-coordinates in MNI space.
